# Supplementary material
Source: Springer Nature journal article supplement (https://www.springermedizin.de/resource/supplementary/12963_2011_157_MOESM3_ESM.pdf/9572778)

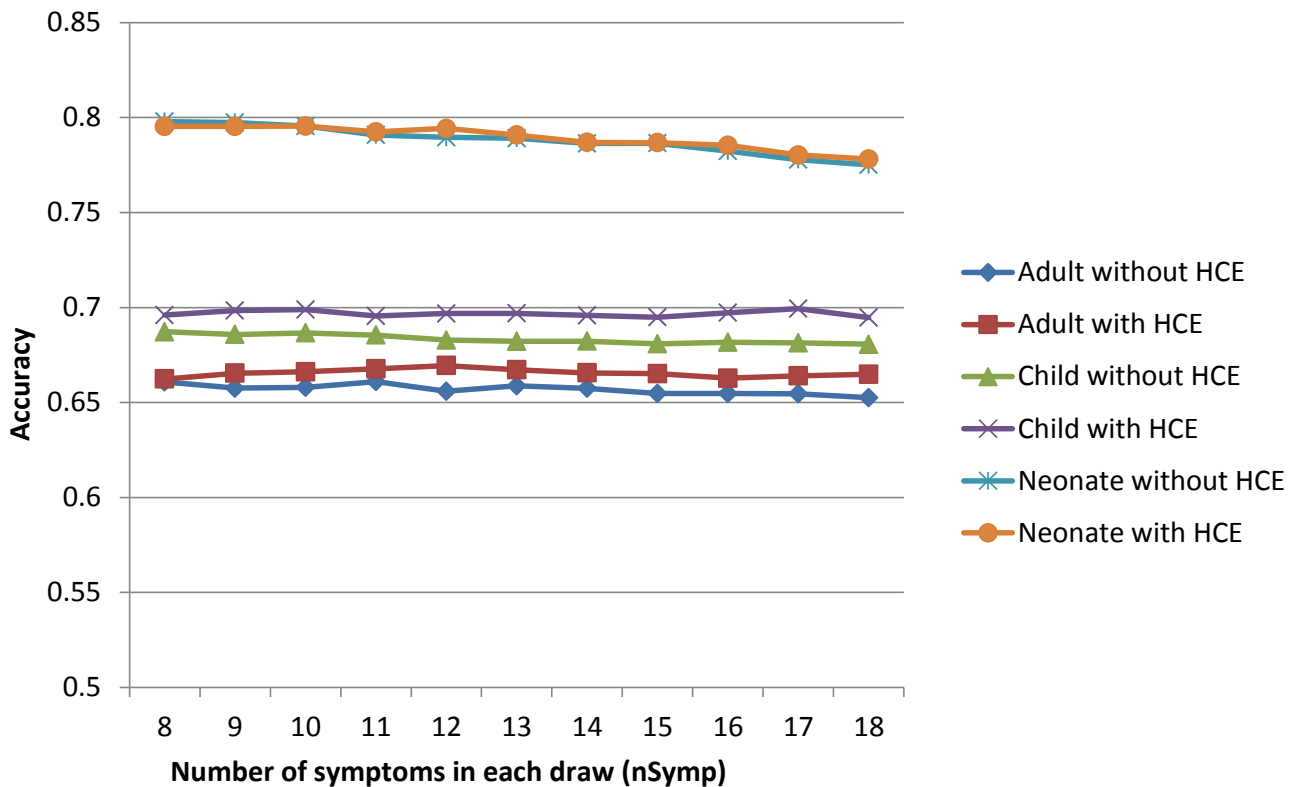

Supplement: MOESM3 [file 9572778]
